# Supplementary material for: Using R in hydrology: a review of recent developments and future directions
Source: Copernicus journal article supplement (doi:10.5194/hess-23-2939-2019), 2019-07-12
Supplement: Supplementary file [file hess-23-2939-2019-supplement-title-page.pdf › hess-23-2939-2019-supplement-title-page.pdf]

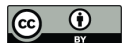

## *Supplement of*

# **Using R in hydrology: a review of recent developments and future directions**

**Louise J. Slater et al.**

*Correspondence to:* Louise J. Slater ([louise.slater@ouce.ox.ac.uk](mailto:louise.slater@ouce.ox.ac.uk))

- [hess-23-2939-2019-supplement-title-page.pdf](#)
- [Supplement\\_Script\\_for\\_Figure\\_1.zip](#)

The copyright of individual parts of the supplement might differ from the CC BY 4.0 License.
